# Supplementary material
Source: PubMed Central journal article supplement (PMC6962022)
Supplement: jciinsight-4-132377-s081.pdf [file jciinsight-4-132377-s081.pdf]

**SUPPLEMENTAL MATERIALS**

**Supplemental Figure 1**

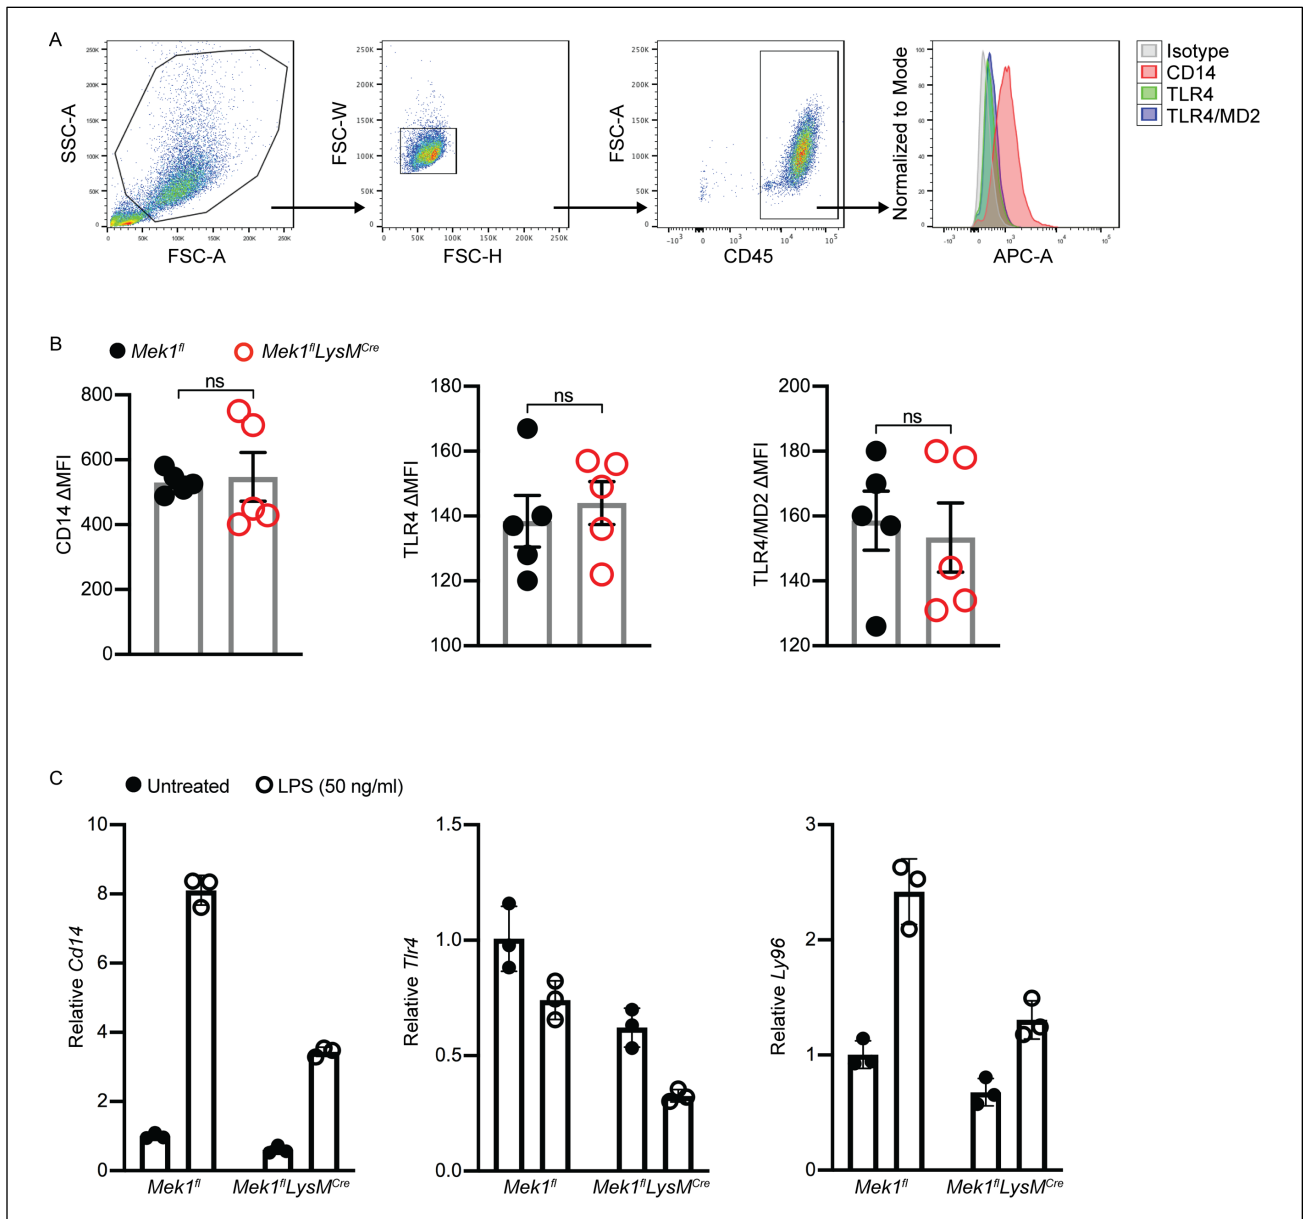

**Supplemental Figure 1:** Alveolar macrophages were obtained from euthanized naïve *Mek1<sup>fl</sup>* and *Mek1<sup>fl</sup>LysM<sup>Cre</sup>* mice by performing five broncho-alveolar lavage (BAL) washes. Cells were stained to analyze the surface expression of CD14, TLR4, and TLR4/MD2 complex relative to an isotype stained control. (A) Representative gating strategy used to identify CD45<sup>+</sup> alveolar macrophages and histogram of representative surface expression relative to an isotype control. (B) Quantitation

of the  $\Delta$ MFI of CD14, TLR4, and TLR4/MD2 complex demonstrate no significant differences between *Mek1<sup>fl</sup>* and *Mek1<sup>fl</sup>LysM<sup>Cre</sup>* mice. Data points show values obtained from an individual mouse (n=5 mice per genotype) and the bar is the mean  $\pm$  SEM. Statistical analyses were performed using unpaired t-test between the genotypes. (C) Naïve alveolar macrophages for each genotype were pooled and seeded at 50,000 cells/well in 96-well plates, with triplicate wells per condition for each genotype. Cells were allowed to adhere for 1 hour at 37°C in RPMI-1640 containing L-glutamine, 10% HI-FBS, 10 mM HEPES, and penicillin/streptomycin. Following adherence, wells were rinsed once with warm PBS and then media (untreated) or media containing 50 ng/ml *E. coli* LPS were added to the wells. RNA was collected after 4 hours and used to make cDNA that was used as the template in qPCR to analyze mRNA levels of *Cd14*, *Tlr4*, and *Ly96* relative to *Hprt*. Samples are normalized to untreated *Mek1<sup>fl</sup>* at 4 hours. Data show values of technical triplicates from cells that were pooled from n=3 mice per genotype and bars are the mean  $\pm$  SD.

## Supplemental Figure 2

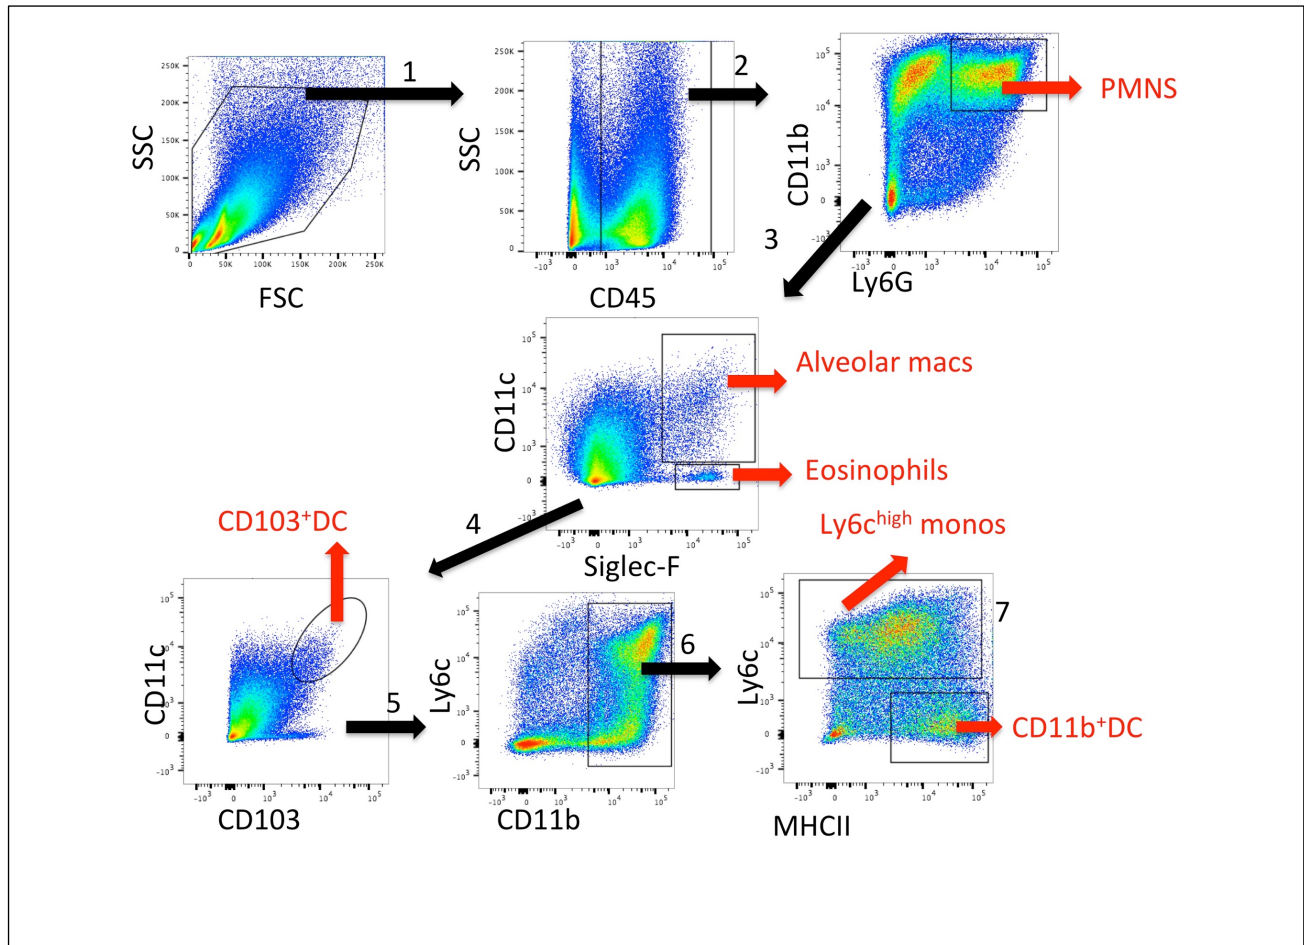

**Supplemental Figure 2:** Flow gating strategy on lung homogenates from day 4 LPS-induced acute lung injury (LPS-ALI) mice. Cells from whole lung homogenates (1) were used to select CD45<sup>+</sup> myeloid cells (2) and PMNs were identified as Ly6G<sup>+</sup>CD11b<sup>+</sup> cells. Non-PMN myeloid cells (3) identified alveolar macrophages as CD11c<sup>+</sup>Siglec-F<sup>+</sup> cells and eosinophils as Siglec-F<sup>+</sup> cells. CD103<sup>+</sup> dendritic cells (DC) (4) were identified and (5) Ly6C cells (6) were further identified as (7) Ly6c<sup>high</sup> monocytes or CD11b<sup>+</sup> DC.

**Supplemental Figure 3**

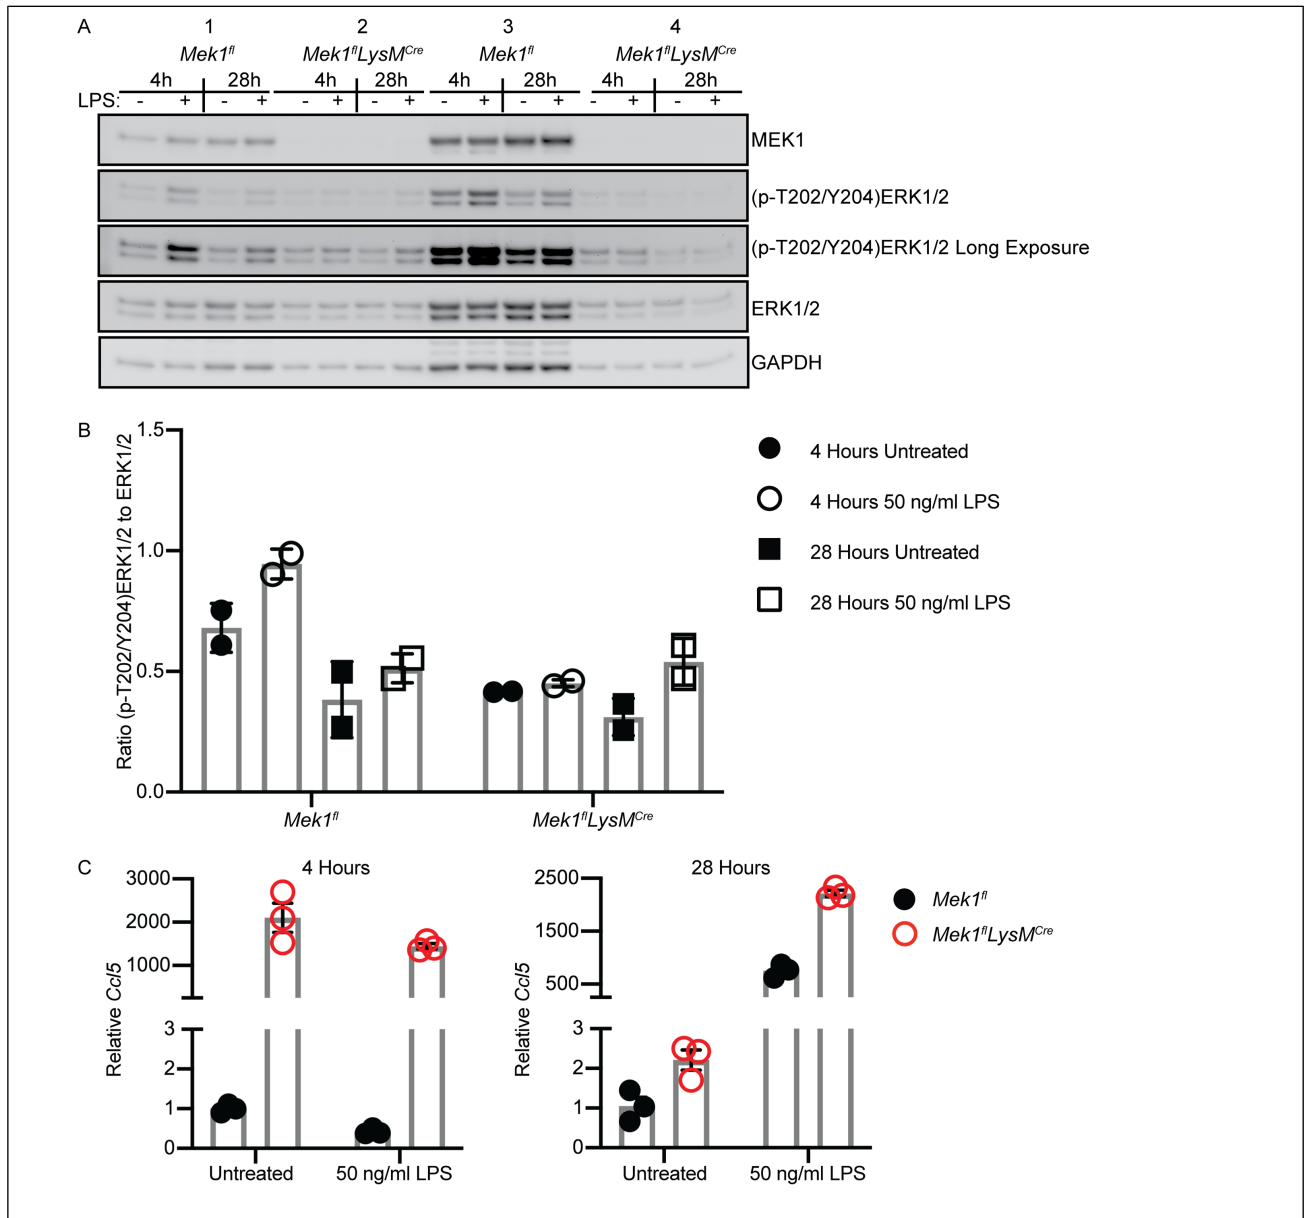

**Supplemental Figure 3:**

Alveolar macrophages were obtained from euthanized naïve *Mek1<sup>fl</sup>* and *Mek1<sup>fl</sup>LysM<sup>Cre</sup>* mice by performing five broncho-alveolar lavage (BAL) washes. (A-B) For each sample (A, number 1-4), cells from n=2 mice per genotype were pooled and seeded into 48-well plates. Cells were allowed to adhere for 1 hour at 37°C in RPMI-1640 containing L-glutamine, 10% HI-FBS, 10 mM HEPES, and penicillin/streptomycin. Following adherence, wells were rinsed once with warm PBS and

then media (untreated) or media containing 50 ng/ml *E. coli* LPS were added to the wells. At 4 or 28 hours after stimulation, wells were rinsed with PBS and protein lysates were collected and used for western blots. (B) ImageJ software was used to measure band intensity by densitometry and the ratio of activated to total ERK1/2 is shown. Data represent individual values from two samples per genotype (each using the pooled cells from n=2 mice), and bar is mean  $\pm$  SD (C) Naïve alveolar macrophages for each genotype were pooled and seeded at 50,000 cells/well in 96-well plates, with triplicate wells per condition for each genotype. Cells were allowed to adhere for 1 hour at 37°C in RPMI-1640 containing L-glutamine, 10% HI-FBS, 10 mM HEPES, and penicillin/streptomycin. Following adherence, wells were rinsed once with warm PBS and then media (untreated) or media containing 50 ng/ml *E. coli* LPS were added to the wells. RNA was collected after 4 hours or 28 hours and used to make cDNA that was used as the template in qPCR to analyze mRNA levels of *Ccl5*, relative to *Hprt*. Samples are normalized to untreated *Mek1<sup>fl</sup>* at either 4 hours or 28 hours. Data show values of technical triplicates from cells that were pooled from n=3 mice per genotype for each timepoint and bars are the mean  $\pm$  SD.

Supplemental Figure 4

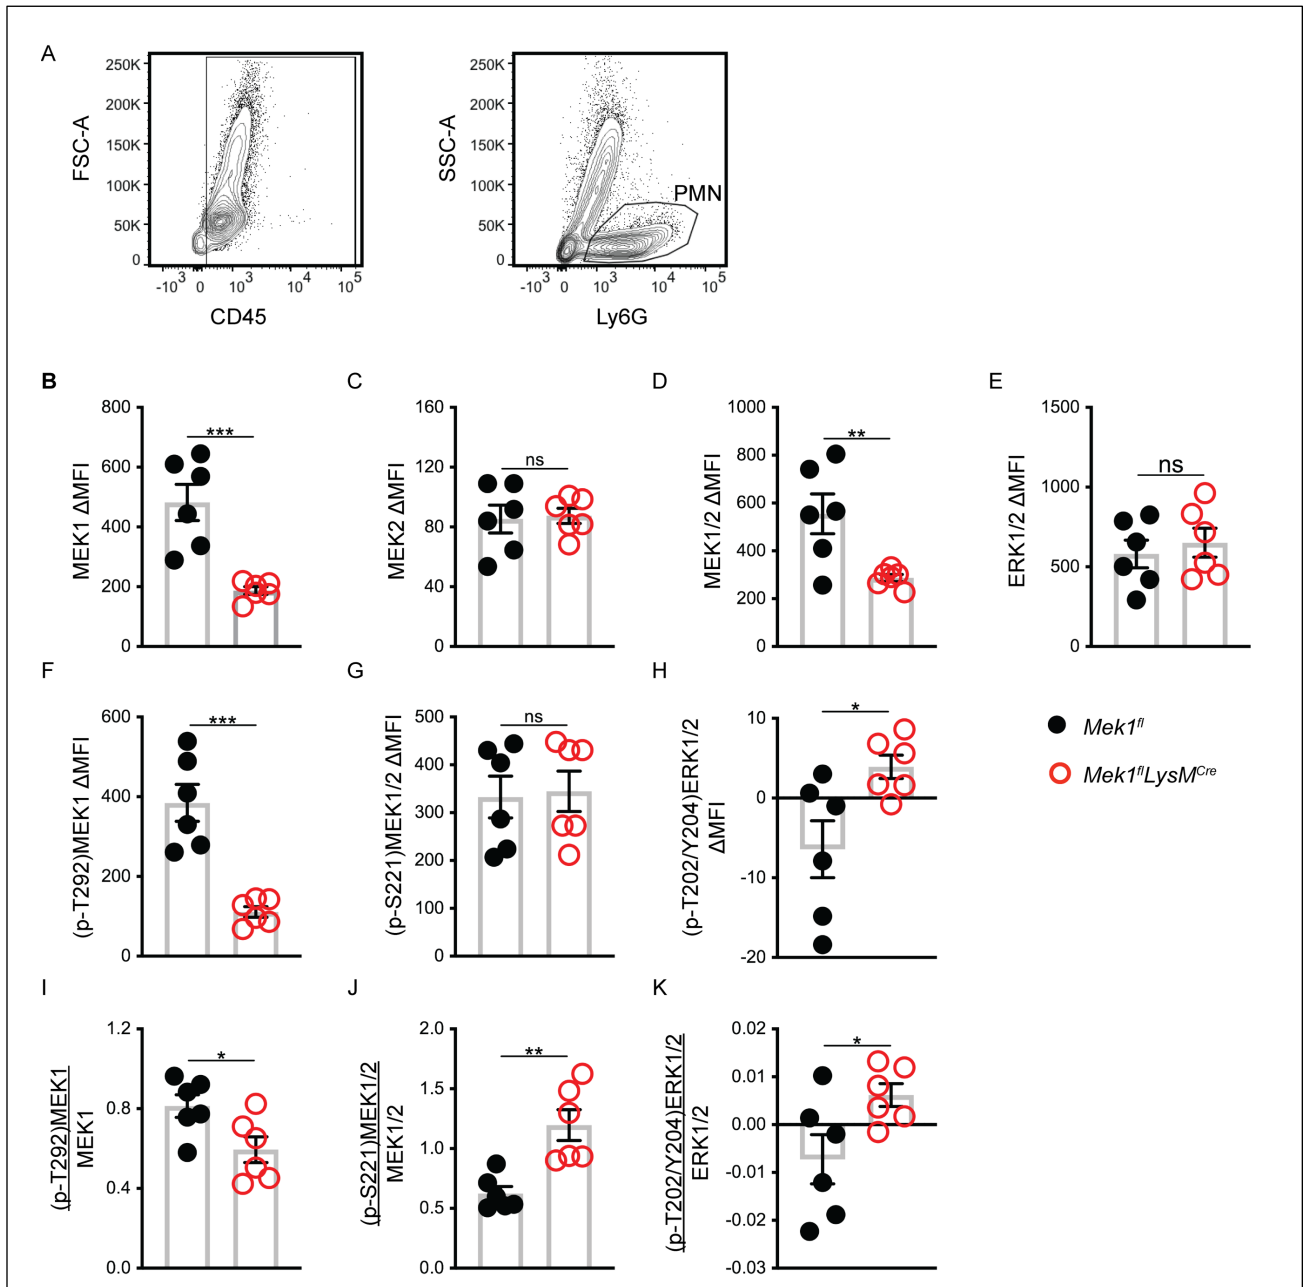

**Supplemental Figure 4:** *Mek1<sup>fl</sup>* and *Mek1<sup>fl</sup>LysM<sup>Cre</sup>* mice were subjected to LPS-induced acute lung injury (LPS-ALI) and alveolar cells were collected by broncho-alveolar lavage (BAL) on day 4. BAL cells were fixed and permeabilized and stained for analysis by flow cytometry. (A) Representative gating strategy to identify CD45<sup>+</sup> cells and PMNs as Ly6G<sup>+</sup> cells. (B-H) The ΔMFI

of PMNs for intracellular total proteins (B) MEK1, (C) MEK2, (D) MEK1/2, (E) ERK1/2, (F) (p-T292)MEK1, (G) (p-S22)MEK1/2, and (H) (p-T202/Y204)ERK1/2 were calculated by subtracting background signal from isotype stained control samples. (I-K) The ratio of the  $\Delta$ MF1 of phosphorylated to total protein was calculated for (I) (p-T292)MEK1 to MEK1, (J) (p-S221)MEK1/2 to MEK1/2, and (K) (p-T202/Y204)ERK1/2 to ERK1/2. Dots represent individual mice and the bar is the mean  $\pm$  SEM. Statistical analyses were performed by unpaired t-tests comparing the two genotypes. \* $P$ <0.05, \*\* $P$ <0.01 \*\*\* $P$ <0.001, ns is not significant.

Supplemental Figure 5

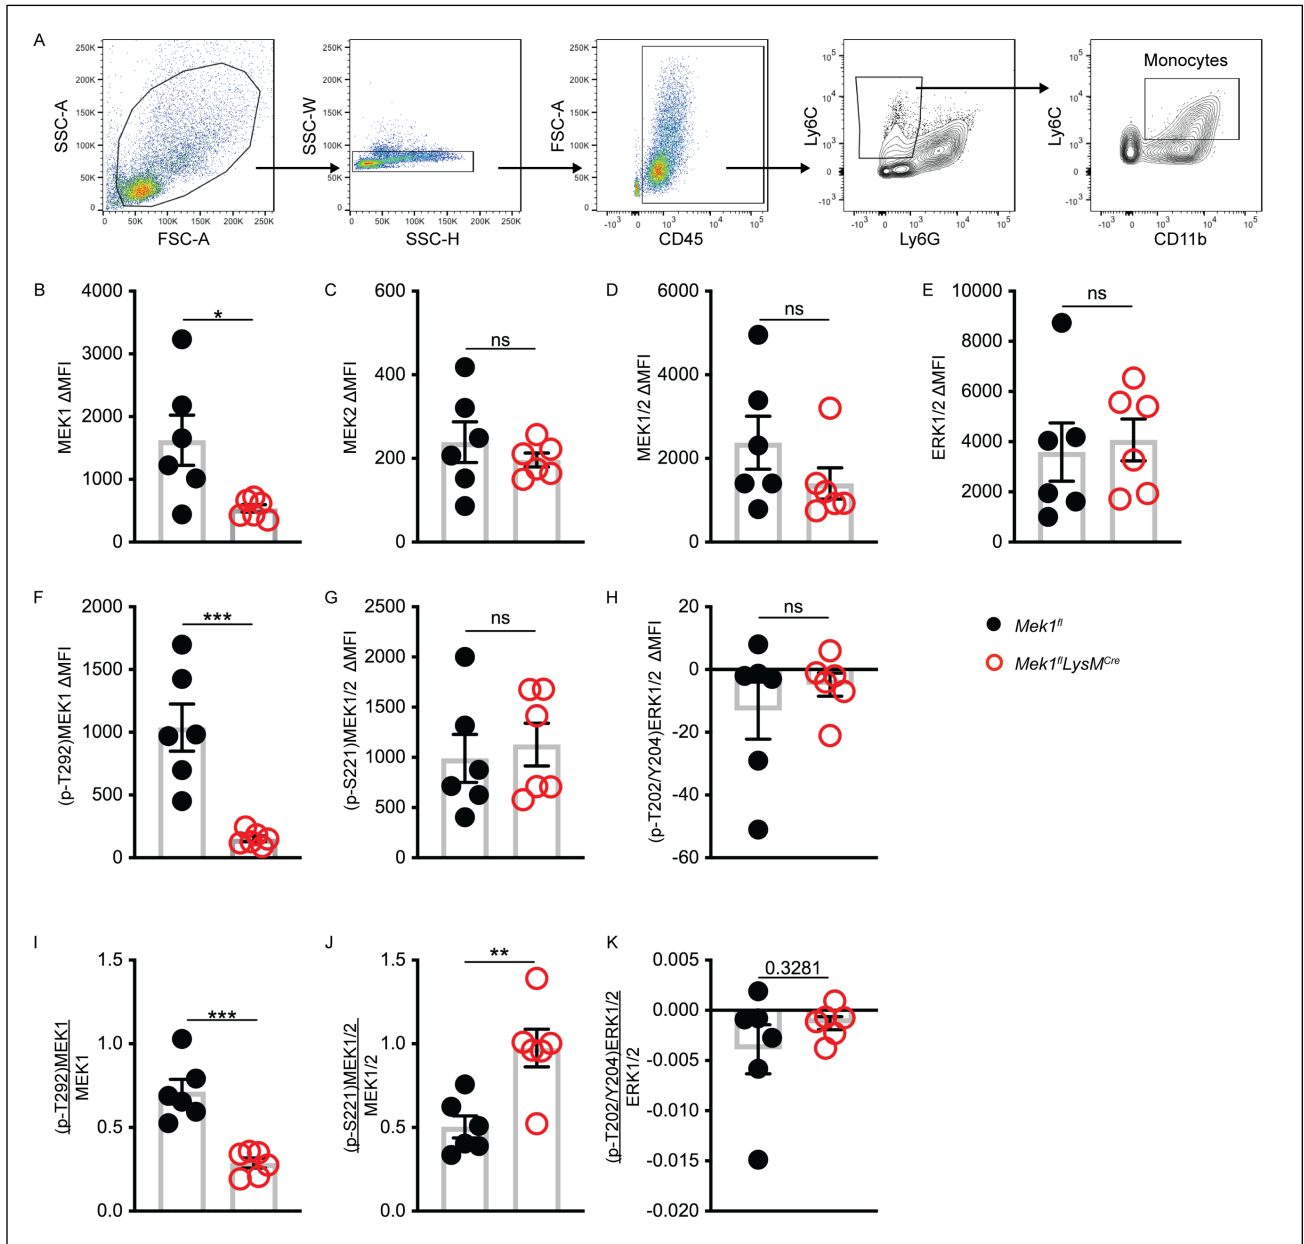

**Supplemental Figure 5:** *Mek1<sup>fl</sup>* and *Mek1<sup>fl</sup>LysM<sup>Cre</sup>* mice were subjected to LPS-induced acute lung injury (LPS-ALI) and alveolar cells were collected by broncho-alveolar lavage (BAL) on day 4. BAL cells were fixed and permeabilized and stained for analysis by flow cytometry. (A) Representative gating strategy to identify CD45<sup>+</sup> monocytes as Ly6G<sup>-</sup>Ly6C<sup>+</sup>CD11b<sup>+</sup> cells. (B-H) The ΔMFI of monocytes for intracellular total proteins (B) MEK1, (C) MEK2, (D) MEK1/2, (E)



ERK1/2, (F) (p-T292)MEK1, (G) (p-S22)MEK1/2, and (H) (p-T202/Y204)ERK1/2 were calculated by subtracting background signal from isotype stained control samples. (I-K) The ratio of the  $\Delta$ MFI of phosphorylated to total protein was calculated for (I) (p-T292)MEK1 to MEK1, (J) (p-S221)MEK1/2 to MEK1/2, and (K) (p-T202/Y204)ERK1/2 to ERK1/2. Dots represent individual mice and the bar is the mean  $\pm$  SEM. Statistical analyses were performed by unpaired t-tests comparing the two genotypes. \* $P$ <0.05, \*\* $P$ <0.01 \*\*\* $P$ <0.001, ns is not significant.

**Supplemental Table 1:** List of western blot antibodies used in this study.

| <b>Target</b>                      | <b>Company</b> | <b>Species</b> | <b>Catalog #</b> |
|------------------------------------|----------------|----------------|------------------|
| $\beta$ -Actin (D6A8)              | Cell Signaling | Rabbit         | 8457             |
| GAPDH (14C10)                      | Cell Signaling | Rabbit         | 2118             |
| P44/42 MAPK (ERK1/2) (137F5)       | Cell Signaling | Rabbit         | 4695             |
| p-P44/42 MAPK (ERK1/2) (T202/Y204) | Cell Signaling | Rabbit         | 9101             |
| MEK1/2 (D1A5)                      | Cell Signaling | Rabbit         | 8727             |
| p-MEK1/2 (Ser217/221) (41G9)       | Cell Signaling | Rabbit         | 9154             |
| MEK1 (D2R10)                       | Cell Signaling | Rabbit         | 12671            |
| p-MEK1 (T292)                      | Cell Signaling | Rabbit         | 51265            |
| MEK2                               | Cell Signaling | Rabbit         | 9125             |

**Supplemental Table 2:** List of flow cytometry antibodies used in this study.

| Target                                            | Company                    | Fluor(s)              | Catalog #                        |
|---------------------------------------------------|----------------------------|-----------------------|----------------------------------|
| CD3 clone OKT3                                    | Tonbo Biosciences          | PerCP Cy5.5           | 65-0037                          |
| CD11b clone M1/70                                 | Biologend                  | PE-Cy7                | 101216                           |
| CD11c clone N418                                  | eBioscience<br>eBioscience | e450<br>APC           | 48-0114-82<br>14-0114-82         |
| CD14 clone Sa2-8                                  | eBioscience                | APC                   | 17-0141-81                       |
| CD45 clone 104                                    | Biologend                  | BV650                 | 109835                           |
| CD45 clone 30-F11                                 | Biologend                  | APC Cy7               | 103116                           |
| CD45 clone 30-F11                                 | Biologend                  | Pacific Blue          | 103126                           |
| CD45 clone HI30                                   | Tonbo Biosciences          | APC Cy7               | 25-0459                          |
| CD103 clone 2E7                                   | Biologend                  | AF288                 | 121408                           |
| CD169 clone 7-239                                 | Biologend                  | APC                   | 346008                           |
| CD170 (Siglec-F) clone 1RNM44N                    | Invitrogen                 | PerCP e710            | 46-0114-82                       |
| CD206 clone 15-2                                  | Biologend                  | BV421                 | 321126                           |
| Ly6C clone HK1.4                                  | Biologend<br>Biologend     | BV785<br>Pacific Blue | 128041<br>128014                 |
| Ly6G clone 1A8                                    | Biologend<br>Biologend     | APC<br>PerCP Cy5.5    | 127614<br>127616                 |
| MHCII clone M5/114.15.2                           | Biologend                  | BV510                 | 107635                           |
| P44/42 MAPK (ERK1/2) (137F5)                      | Cell Signaling             | PE                    | 8867                             |
| ERK1/2 Phospho (Thr202/Tyr204) clone 6B8B69       | BioLegend                  | PE                    | 369506                           |
| MEK1/2 (D1A5)                                     | Cell Signaling             | PE                    | 28708                            |
| p-MEK1/2 (Ser221) (166F8)                         | Cell Signaling             | PE                    | 16211                            |
| MEK1 clone 25/MEK1                                | BD Biosciences             | PE                    | 560099                           |
| p-MEK1 (T292) (D5L3K)                             | Cell Signaling             | PE                    | Custom Order<br>PE-<br>Conjugate |
| MEK2 Clone 96/MEK2                                | BD Biosciences             | PE                    | 560388                           |
| TLR4 (CD284) clone SA15-21                        | BioLegend                  | APC                   | 145406                           |
| TLR4/MD2 Complex clone MTS510                     | eBioscience                | APC                   | 17-9924-82                       |
| Rabbit (DA1E) mAb IgG XP isotype control          | Cell Signaling             | PE                    | 5742                             |
| Mouse IgG2a, κ Isotype Ctrl (ICFC) clone MOPC-173 | BioLegend                  | PE                    | 400244                           |
| Rat IgG2a Kappa Isotype Control clone eBR2a       | eBioscience                | APC                   | 17-4321-81                       |

**Supplemental Table 3:** List of primer probes used in this study.

| <b>Target</b> | <b>Company</b>    | <b>Species</b> | <b>Catalog #</b> |
|---------------|-------------------|----------------|------------------|
| <i>Ccl5</i>   | Life Technologies | Mouse          | Mm01302427_m1    |
| <i>Cd14</i>   | Life Technologies | Mouse          | Mm01158466_g1    |
| <i>Cxcl1</i>  | Life Technologies | Mouse          | Mm04207460_m1    |
| <i>Cxcl10</i> | Life Technologies | Mouse          | Mm00445235_m1    |
| <i>Hprt</i>   | Life Technologies | Mouse          | Mm01545399_m1    |
| <i>Ifit1</i>  | Life Technologies | Mouse          | Mm00515153_m1    |
| <i>Il1b</i>   | Life Technologies | Mouse          | Mm00434228_m1    |
| <i>Ly96</i>   | Life Technologies | Mouse          | Mm01227593_m1    |
| <i>Nos2</i>   | Life Technologies | Mouse          | Mm00440502_m1    |
| <i>Tlr4</i>   | Life Technologies | Mouse          | Mm00445273_m1    |

**Supplemental Table 4:** Characteristics of human subjects participating in the study.

| <b>Subject</b>    | <b>Sex</b> | <b>Age</b> | <b>ARDS Risk Factor</b> | <b>Sample Collection (Days Post ARDS Development)</b> |
|-------------------|------------|------------|-------------------------|-------------------------------------------------------|
| Healthy Control 1 | Female     | 21         | N/A                     | N/A                                                   |
| Healthy Control 2 | Female     | 34         | N/A                     | N/A                                                   |
| ARDS Patient 1    | Male       | 82         | Aspiration              | 1                                                     |
| ARDS Patient 2    | Male       | 70         | Aspiration/Pneumonia    | 0                                                     |
| ARDS Patient 3    | Male       | 29         | Trauma                  | 9                                                     |
| ARDS Patient 4    | Male       | 20         | Trauma                  | 12                                                    |
